# Supplementary material for: Modeling apparent Pb loss in zircon U-Pb geochronology
Source: Copernicus journal article supplement (doi:10.5194/gchron-2023-6), 2023-04-12
Supplement: Supplementary file [file gchron-2023-6-AC2-supplement.pdf]

# Response to Reviewer 2's comments on manuscript gchron-2023-6 "Modeling apparent Pb loss in zircon U-Pb geochronology"

Glenn R. Sharman and Matthew A. Malkowski  
June 7, 2023

Reviewer #2 provides an overall critical assessment of our manuscript with comments that focused on (1) the novelty of our study, (2) criteria for what types of data should be included in a modeling study, and (3) parts of the text with overstated or imprecise language. Although we generally disagree with Reviewer #2's characterization of points (1) and (2) and provide a rebuttal below, there are many aspects of Reviewer #2's comments that are well taken and that we will incorporate into a future revision. For instance, we now appreciate that there is a need to better describe how our study relates to previously published work on Pb loss modeling in general and to better articulate the specific aims of this study.

Below, we provide a response to Reviewer #2's comments and explain how we will specifically incorporate suggestions in a future revision with ***bold, italic text***. We also provide Reviewer #2's comments below with line numbers, which we reference in our response.

We would like to note that although Reviewer #2 provided extensive comments, this review lacked an assessment of the paper's central thesis – that apparent Pb loss may be characterized by mathematical convolution. Indeed, the review does not use the word "convolution" and does not include comments on the feasibility of the approach – either positive or negative.

## 1. Novelty of the study

Reviewer #2 questions the novelty of our study. For example, Reviewer #2 suggests that "there are already well-established, more appropriate, and more powerful mechanisms" that involve geochemical characterization (U, Fe, Ca, REE, OH, etc.), analysis via Raman spectroscopy, and internal mineral texture (lines 7-11). Reviewer #2 goes on to provide examples of 'similar population-based approaches' (lines 96-112), citing Morris et al. (2015), Kirkland et al. (2017), Kirkland et al. (2020), and others. Similarly, Reviewer #2 suggests that our treatment of detrital zircon has already been addressed (lines 137-143).

Although we appreciate the suggestions for additional references that relate to the general topic, we would like to emphasize that none of the studies mentioned by Reviewer #2 relate to the specific topic of this paper: assessing distributions of apparent Pb loss magnitude through mathematical convolution. Some of these papers focus on modeling the timing of Pb loss (Morris et al., 2015; Kirkland et al., 2017) and one correcting for common Pb (Anderson, 2002). We thus contest Reviewer #2's assertion that the central thesis of our manuscript has already been published (lines 7-12). None of the references that Reviewer #2 provides mention convolution or attempt to model distributions of apparent Pb loss magnitude. In our future revision, ***we will revisit the introductory text to make sure that we avoid overstating the novelty of this work through specific and precise language about the contribution provided.***

## 2. Criteria for a Modeling Study

Reviewer #2 cites a general community preconception, or skepticism, of model-based studies in that they are “unreliable to the point of being unproductive” (lines 27-32). Reviewer #2 goes on to suggest that new model-based approaches should satisfy two specific set of conditions (lines-27-55). These conditions include specific data types (paired LA-ICP-MS and TIMS, known timing of Pb loss, detailed petrologic data, CL + BSE images, Raman spectroscopy, and mineral chemistry data) (lines 34-55).

Although we don't dispute that the dataset described would likely make an excellent study of Pb loss, we contend that there is no single way to study Pb loss. The type of data collected for a given study should depend on the goals and objective of the study, not a preconditioned list of items specified *a priori*. Reviewer #2 does not explain why the framework of mathematical convolution fails without these data.

There are several reasons why the types of data suggested would be challenging to collect for the purpose of our study. It is not our goal to characterize Pb loss in any single zircon crystal, but rather to characterize the *distribution* of Pb loss magnitude that has influenced an entire sample. This requires ideally many U-Pb analyses from numerous zircon crystals, versus detailed characterization of fewer grains. Specifically, the geochemical data requested (e.g., Fe, Ca, OHO) are not routinely collected during *in-situ* U-Pb geochronology. Routine datasets provide only U and Th concentrations and isotopic ratios ( $^{206}\text{Pb}/^{238}\text{U}$ ,  $^{207}\text{Pb}/^{235}\text{U}$ ). We don't dispute that collecting additional data types (e.g., REE) could be useful, and we specifically mentioned this in our original submission (lines 460-462).

This study simply presents a mathematical concept (convolution) for quantifying the distribution of Pb loss magnitude. The datasets we analyze are from, in part, previously published studies that we view in high esteem (e.g., von Quadt et al., 2014; Watts et al., 2016), and the point of our paper mirrors their own: that an offset exists between non-CA and CA U-Pb dates. Our contribution is to provide a mathematical framework for better quantifying that offset in terms of a distribution, rather than as a simple percentage shift. It seems that this simple aim might have been lost on Reviewer #2 (e.g., lines 139-143). In our revision, ***we will revisit the introductory text to make sure that the aim of this paper is clearly communicated.***

Although we disagree with Reviewer #2's criteria for what must be in a modeling study, we do appreciate that the geochronology community is broad and diverse, and that our manuscript might be better received if we were more specific about the context and purpose of this study. In our future revision, ***we will revisit the introductory text to better communicate the aims and context of this paper. We will also better articulate the intended audience of this work (i.e., in-situ U-Pb community) and the expected value. We would also consider changing the title of our paper to be more specific.***

## 3. Other Points

Reviewer #2 highlights several places in the text where our language is vague, overstated or imprecise. Reviewer #2 also highlights opportunities to improve our referencing. We provide a

bullet list of these comments and our responses. Overall, these comments will be helpful in improving the revised manuscript.

- Improve the description of causes of radiogenic Pb, specifically by clarifying that fluids are needed to remove Pb (lines 62-65). ***In our revision, we will review the suggested literature and revise the Introductory text appropriately to more completely describe causes of Pb loss.***
- Mention potential causes of non-Gaussian distributions of U-Pb dates, specifically the common Pb correction (see also comment by Reviewer #1) and complexities related to zircon growth (lines 66-84). ***In our revision, we will include improved discussion surrounding our assumption of a starting Gaussian distribution and situations for which this assumption may not be appropriate. We will also clarify that our assumption of Gaussian distribution is one of convenience – mathematical convolution could be done with any distribution type that reflects the underlying non-Pb loss perturbed U-Pb date distribution.***
- Consideration of how the various distributions might relate to geologic processes (lines 113-120). This is a good suggestion, and in our revision ***we will include discussion of potential mechanistic links between geologic processes and distribution types.*** For example, we find it intriguing that the Weibull distribution, which was the best-fitting function for apparent Pb loss distributions, has also been applied to modeling particle size distributions (Zobeck et al., 1999).
- Avoid suggesting that “Pb loss in natural samples has not been well characterized” in the abstract (line 122). In our revision ***we will take care to use more precise language and avoid broad statements.*** We agree with the reviewer that much work has been done on open-system behavior in the U-Pb system, and did not intend to imply otherwise.
- Include a more comprehensive list of references (lines 131-133). In our revision, ***we will make more effort to cite relevant studies by a broader diversity of authors, including those mentioned by Reviewer #2.***
- Revise the statement relating to how analyses are pulled off concordia during Pb loss (lines 134-136, referencing line 34 of the original submission). In our revision, ***we will clarify that the analyses may not be pulled completely off of Concordia depending on magnitude of Pb loss and measurement precision, and we will clarify that this takes place during the timing of Pb loss.***
- Mention the fact that open-system behavior is itself useful geologic information that is removed via CA (lines 144-151). This point is well taken. It is not the goal of our work to study the geologic processes associated with Pb loss (e.g., timing). However, this does not mean that this is not useful information for geologic studies. In our revision, ***we will include statements in the discussion that clarify this point.***
- Be more specific about the aim of future data collection (lines 152-161). This is a point well taken. In our revision, ***we will include a better description of the overall goal for which the data collection strategy is oriented.*** This goal is to better quantify the distributions of apparent Pb loss magnitude in untreated, *in-situ* LA-ICP-MS analyses.
- Avoid appealing to increasing precision to identifying Pb loss (lines 162-167). We believe that this assertion is valid, as shown by Fig. 8. The complexities mentioned here seem to arise from our assumption of the underlying age distribution being Gaussian. ***We will incorporate additional statements related to this assumption*** (see also lines 66-84 above).

- Consider the implications for thermochronology (lines 168-170). We view this suggestion as being outside of the scope of our study. We are uncertain why the passage of zircon through its closure temperature (He or fission track?) is relevant to the modeling framework that we present.

## References

- Andersen, T.: Correction of common lead in U-Pb analyses that do not report  $^{204}\text{Pb}$ . *Chemical Geology* 192, 59-79, 2002.
- Kirkland, C.L., Abello, F., Danišik, M., Gardiner, N.J., and Spencer, C.: Mapping temporal and spatial patterns of zircon U-Pb disturbance: A Yilgarn Craton case study. *Gondwana Research* 52, 39-47, 2017.
- Kirkland, C.L., Barnham, M., and Danišik, M.: Find a match with triple-dating: Antarctic sub-ice zircon detritus on the modern shore of Western Australia. *Earth and Planetary Science Letters* 531, 115953, 2020.
- Morris, G.A., Kirkland, C.L., and Pease, V.: Orogenic paleofluid flow recorded by discordant detrital zircons in the Caledonian foreland basin of northern Greenland. *Lithosphere* 7, 138-143, 2015.
- von Quadt, A., Gallhofer, D., Guillong, M., Peytcheva, I., Waelle, M., and Sakata, S.: U-Pb dating of CA/non-CA treated zircons obtained by LA-ICP-MS and CA-TIMS techniques: impact for their geological interpretation. *J. Anal. At. Spectrom* 29, 1618-1629, 2014.
- Watts, K.E., Coble, M.A., Vazquez, J., A., Henry, C.D., Colgan, J.P., and John, D.A.: Chemical abrasion-SIMS (CA-SIMS) U-Pb dating of zircon from the late Eocene Caetano caldera, Nevada. *Chemical Geology* 439, 139-151, 2016.
- Zobeck, T.M., Gill, T.E., and Popham, T.W.: A two-parameter Weibull function to describe airborne dust particle size distributions. *Earth Surface Processes and Landforms* 24, 943-955, 1999.

1 The work by Sharman and Malkowski presents a model-based consideration of the effects of  
2 radiogenic-Pb loss in zircon. Such effects are well known in the U-Pb community and a discussion  
3 on the diagnosis of open system behaviour of widespread importance for U-Pb geochronology.  
4 Nonetheless, there are some significant concerns with aspects of the study that preclude me  
5 recommending publication in its current form.

6 Specifically, the work apparently seeks to better characterise radiogenic-Pb loss in situations that  
7 it may be cryptic. However, there are already well-established, more appropriate, and more  
8 powerful mechanisms to do this. For example, simple comparison of isotopic ratios to  
9 geochemistry (uranium, iron, calcium, REE, raman, OHO, etc) and / or internal mineral texture  
10 will already provide a much simpler but much more powerful way to demonstrate the presence of

11 Pb loss. In short, it is unclear how the proposed models provide a tool that will be used to advance  
12 geochronology interpretations.

13 I am sorry to do this, but I think this work needs to be considered in the historical context of U-Pb  
14 geochronology because it is relevant to perceptions around model-based U-Pb approaches and (as  
15 I get to) has implications for key tests for this work. In the 1960s U-Pb isotopic analyses of zircon  
16 clearly demonstrated that in many cases zircon behaves in an open system fashion (e.g. is  
17 discordant). Now many researchers at that time also attempted to extract primary ages (and  
18 secondary overprinting) by interpreting linear and indeed non-linear arrays on concordia diagrams  
19 using models that rapidly increased in complexity (for example; Tilton 1960 JGR, Silver and  
20 Deutsch 1963 Journal of Geology, Steiger and Wasserburg 1966 JGR). Other developments also  
21 happened at around the time model-based interpretations were in vogue. Namely, isotope dilution  
22 analysis of single zircon grains with air abrasion and magnetic separation (e.g. Krogh) and of  
23 course in situ dating via ion microprobe dating (e.g. Compston). These analytically based  
24 developments set zircon U-Pb geochronology on the pathway of identification, extraction, and  
25 dating of grain domains with closed U-Pb systems (or specific targeting of open system domains  
26 where geochemical evidence could also be brought to bear on the subject).

27 Now my point (and I am aware of this from my own experience in reviews) the general community  
28 has a strong preconception that model-based approaches are generally unreliable to the point of  
29 being unproductive (given the numerous processes that can lead to the same distribution). Hence,  
30 works that try to revive a model-based approach to U-Pb geochronology, in an effort, to enhance  
31 understanding and make such models helpful to better understand geology, must allay this  
32 perception. In order to achieve this outcome of an advance then what can be done: Well, it would  
33 seem logical to this reviewer, that any new model-based approach needs to satisfy two conditions:

34 1/ It must be quantitatively calibrated against high quality closed-system geochronological data  
35 AND known times of disturbance. The choice of the samples where both primary and secondary  
36 ages are determined by precise, accurate and model-independent methods for such tests is crucial.  
37 Unfortunately, the sample choice in this work failed this criterion as the same grains were not  
38 analysed after LA-ICPMS by TIMS and in fact, in some cases the chosen studies have used even  
39 a different isotopic system to constrain the “true” age. Moreover, the timing of overprinting  
40 processes has not been clearly independently determined on the same material to the level needed.  
41 Hence, to demonstrate the use of this work and continue this study, such condition really needs to  
42 be passed. Such tests would significantly benefit from including detailed geological and petrologic  
43 information so the geological context and implications of the proposed models can be understood.  
44 This would necessitate detailed characterization of the grains, for example CL and BSE images  
45 before and after analyses, the latter showing ablation spots (and potentially also Raman  
46 spectroscopy) so any relationship between these grain level observations and isotopic ratios could  
47 be made, as they would serve as prima facie evidence of open system conditions.

48 2) It must be demonstrated that the new approach yields new information that is not available and  
49 unobtainable with modern closed system methods or simple relationships already at hand. This is  
50 a big challenge because by combination of mineral chemistry with isotopic ratios already can yield  
51 much more rigorous insight into geological processes than by this strongly model based example  
52 of age distribution fitting. Furthermore, any ages calculated, or more specifically in this case,

53 distributions proposed with such new methods really needs to be accompanied by uncertainty  
54 intervals that include the model-related uncertainty around the distribution. This is a very difficult  
55 goal to achieve.

56 In this current study, there appears to be a significant way to go to satisfactorily address both these  
57 conditions.

## 58 **Significant issues**

59 Precision in the language. There are numerous cases where the level of precision in the text could  
60 lead to miss-interpretation by a reader. Moreover, there are specific inaccuracies. Please refer to  
61 the specific points below which document some of these.

62 The discussion of the causes of radiogenic Pb loss appears incomplete. While a damaged crystal  
63 structure is clearly a factor it isn't the sole prerequisite for open system processes. Please see the  
64 work of Silver / Pigeon which clearly demonstrates that fluids are also needed to strip Pb. In short,  
65 a more accurate description of radiogenic-Pb loss is needed.

66 Assumption of a gaussian distribution for the undisturbed zircon state of U-Pb ratios. There are  
67 several primary processes that could lead to a non-gaussian distribution that should at least be  
68 mentioned. While the simplifying assumption of a gaussian distribution is a reasonable starting  
69 position for certain growth processes, the work would be improved with a consideration of the  
70 natural complications to this situation. For example: Common Pb – it's presence and form of  
71 correction. Specifically, a non-uniform common Pb composition (while unlikely to be of  
72 significant concern in zircon and of more relevance for minerals with typically higher common Pb  
73 loads e.g. apatite and titanite) will invalidate the assumption of a gaussian distribution.  
74 Furthermore, there would be expected to be a complex interrelationship between radiogenic-Pb  
75 loss, discordance, and common Pb amount and composition that would have an implication for the  
76 model. Moreover, as precision increases so a natural outcome of this will be a non-gaussian  
77 distribution, the point where this non-gaussian distribution appearance breaks down would be a  
78 function of the growth duration of a population of zircon which is highly magma (size,  
79 temperature, cooling rate, chemistry, etc) dependent. A more sophisticated realisation of what  
80 zircon growth is, would benefit this work (there are several new mineral equilibrium model papers  
81 that deal with zircon growth rates that clearly are relevant in this regard). It is highly simplistic,  
82 without any caveats, to assume zircon growth is instantaneous – there are many environments  
83 where prolonged zircon growth has been demonstrated and these sorts of environments are entirely  
84 unsuited to a model assumption of a normal distribution.

85 Overlooked published similar population-based approaches in geochronology:

86 The work makes quite a few claims of novelty. While aspects of the proposed model are indeed  
87 new, there is quite a body of existing work that uses ostensibly, very similar, to similar, to quite  
88 similar approaches to understand: 1/ the most likely timing of radiogenic-Pb loss, 2/ mixing  
89 between different compositional domains and 3/ common Pb correction.

90 Specifically, the comparison between a model distribution and a measured U-Pb distribution has  
91 in fact been frequently previously utilized and a recognition of this foundation to the present study  
92 clearly required to provide context to this work and demonstrate the advance it makes.

93 The following works are only those I am aware of, but they may provide some useful context from  
94 which the current model appears developed. It is odd they are not considered and implies some  
95 limitation in the survey of existing literature relevant to this work.

#### 96 *Pb loss modelling*

97 1/ Morris et al., 2015, *Lithosphere*, 138-143; Kirkland et al., 2017, *GR*, v. 52, 39-47; Kirkland et  
98 al., 2020, *GR*, v. 77, 223-237. There are probably other publications from this research group that  
99 use distribution comparison techniques to understand Pb loss as well.

100 Of note here is that the similarity test for the model distribution to the measured distribution is  
101 essentially the same as this work proposes. Surely, this should be acknowledged. The major  
102 difference in these works and the current approach is that they used the observed concordant  
103 distribution in the model whereas the approach proposed in this work is to compare the age  
104 distribution to theoretical distributions.

#### 105 *Unmixing*

106 2/ Olierook et al., 2021, *GR*, v. 92, 102-112.

107 A similar approach in some regards to address the potential of mixing between different zircon  
108 domains. It also uses a comparison between a reconstructed (e.g. model) distribution and a known  
109 distribution.

#### 110 *Common Pb correction*

111 3/ Andersen 2002, *CG*, v. 192, 59-79.

112 The common Pb correction approach of Andersen uses some of the same concepts.

113 The proposed procedure would be able to provide more geological insight if the various  
114 distributions (gamma, Weibull, lognormal, uniform, half normal, pareto etc) compared to the data  
115 were firmly rooted in some dominant geological process. Specifically, the discussion of the  
116 distribution shapes relative to geological processes needs to be significantly enhanced. For  
117 example, even simple end member distributions can be linked to likely geological processes;  
118 radiogenic-Pb loss / uranium gain / Pb gain / U loss, discrete or episodic, common Pb gain,  
119 heterogeneous common Pb, recent Pb loss, ancient Pb loss. In short, more geological context is  
120 required for the patterns that are compared to the measured data.

#### 121 **Specific points**

122 Abstract: the authors claim that Pb loss in natural samples has not been well characterized. I would  
123 dispute this, the simplest measure of this process (discordance) is the primary filter essentially  
124 every U-Pb geochronology work uses, there are numerous works considering the process of  
125 radiogenic-Pb loss from the pioneering work of Silver, Pigeon, Krough, Black etc, the field of U-  
126 Pb geochronology has been focused around addressing open system processes (just consider the  
127 formulation of the concordia and Tera-Wasserburg diagrams even). So is it really “not well  
128 characterized”? However, is radiogenic-Pb loss **difficult** to characterise, absolutely it **can** be,  
129 depending on the measurement precision (which itself can be a function of age). This latter aspect  
130 is worth focusing on, to indicate where the proposed modelling approach may have benefits.

131 Line 26>. Very limited referencing to U-Pb geochronology concepts that appear to favour a  
132 specific author. Suggest providing a more balance and historically accurate list of references that  
133 recognises the contributions to the field.

134 Line 34. Inaccurate statement, depending on when radiogenic Pb loss has occurred (and the  
135 measurement precision) and the degree of radiogenic Pb loss (e.g. if complete) data may not be off  
136 the concordia curve.

137 Section 5.3 has specifically been addressed in other works (using a similar more tailored approach)  
138 it seems highly unusual that this context isn't provided here.

139 Also, the proposed approach for DZ seems incomplete as it is unclear what the purpose of this  
140 modelling is for; is it to better understand the primary crystallization ages, the timing of Pb loss,  
141 or the degree of mixing between different age components in any distribution? Furthermore, the  
142 proposition is somewhat cryptic and certainly difficult to apply to a detrital situation. I really don't  
143 see the contribution this paragraph of text makes to the overall presentation.

144 A major assumption of this work is that radiogenic-Pb loss is an impediment to understanding. Yet  
145 the reality is that tracking open system processes is possible with radiogenic-Pb loss and depending  
146 on the geological question posed, a very useful way of gaining otherwise difficult to access  
147 geological information. Moreover, the whole point of insitu dating is to characterize the full range  
148 of (texturally / geochemically defined) age components thus providing an understanding of the full  
149 range of geological processes a sample may have undergone. CA work clearly has its place but it  
150 is inevitable that such approach is removing some element of geological information in favour of  
151 another. The text is strongly one sided in its appraisal of CA and its merits or otherwise.

152 The discussion of strategies for future data collection needs to be very specific about what the aim  
153 of any data collection is; is it to date igneous crystallization, metamorphism, fluid mediated  
154 recrystallization, overprinting thermal events? What? Such fundamental information is necessary  
155 first before the strategy can be evaluated for the proposed purpose because such underlying  
156 geological question would affect everything from required temporal resolution to the most likely  
157 manifestation of radiogenic-Pb loss. Simply arguing for greater number of analyses to better  
158 characterise apparent age distributions seems a rather weak suggestion. The more dominant age  
159 components (be they detrital or caused by radiogenic-Pb loss) will be more likely to be sampled  
160 (assuming random sampling) for any n selected. This aspect appears to be overlooked but the  
161 statistics in some of the DZ work of Anderson and others demonstrate this point.



162 It is incorrect to appeal to increasing precision alone to identify radiogenic-Pb loss. The natural  
163 extension of this argument ends, rather, with being able to identify the timeframes of which zircon  
164 itself grows; there are plenty of zircon growth models about based on modified equilibrium  
165 pseudosections that demonstrate zircon has variably prolonged growth intervals in certain  
166 environments. Again, the geological environment that the strategy is proposed for needs to be  
167 much better presented (e.g. rapid volcanic crystallization).

168 Furthermore, it would seem useful to consider the model in the context of thermochronology  
169 considerations where timing through closure temperature is of relevance (e.g. growth within a  
170 magma chamber versus explosive removal from that chamber).

171 The reality is that strategies should be developed that integrate geochemical parameters of the  
172 zircon to better understand the growth or modification process the U-Pb systematics have been  
173 potentially affected by. Considering the age distribution alone seems a simplistic and potentially  
174 highly misleading approach given the numerous confounding variables that could give rise to the  
175 same distribution.
